# Supplementary material
Source: PubMed Central journal article supplement (PMC4215930)
Supplement: NIHMS614737-supplement-Supporting_Information.pdf [file NIHMS614737-supplement-Supporting_Information.pdf]

Figure S1

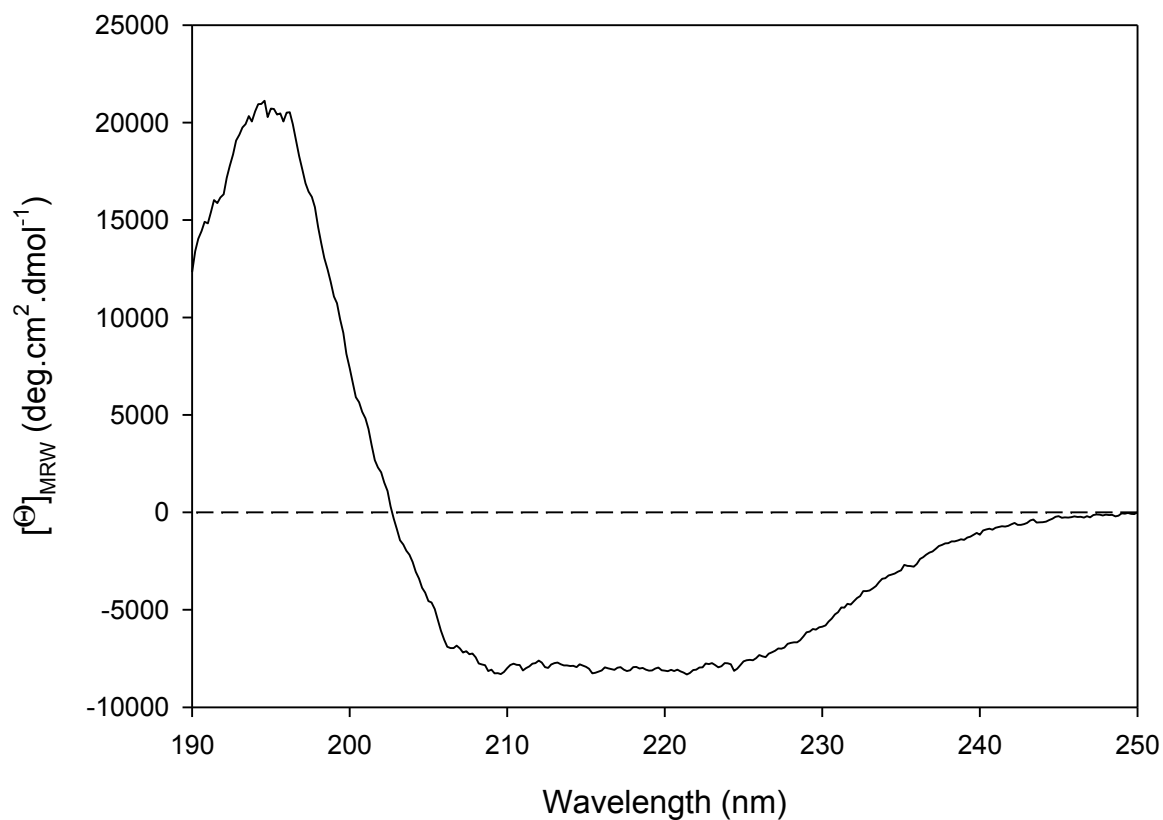

Far UV CD spectra of *sp*-IDI-2. Data were obtained at 20°C, in water, pH 7. The spectrum was recorded at a protein concentration of 3.5  $\mu$ M, in a 0.1 cm cell and data are given as mean residue ellipticity. Average helical content, calculated using CDSSTR, SELCON and CONTIN, is  $30 \pm 1$  %.

Figure S2

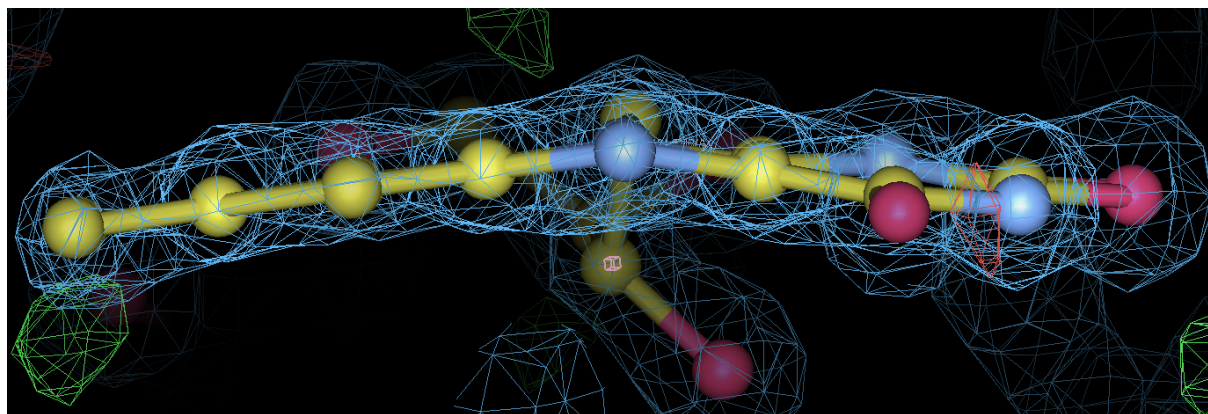

A

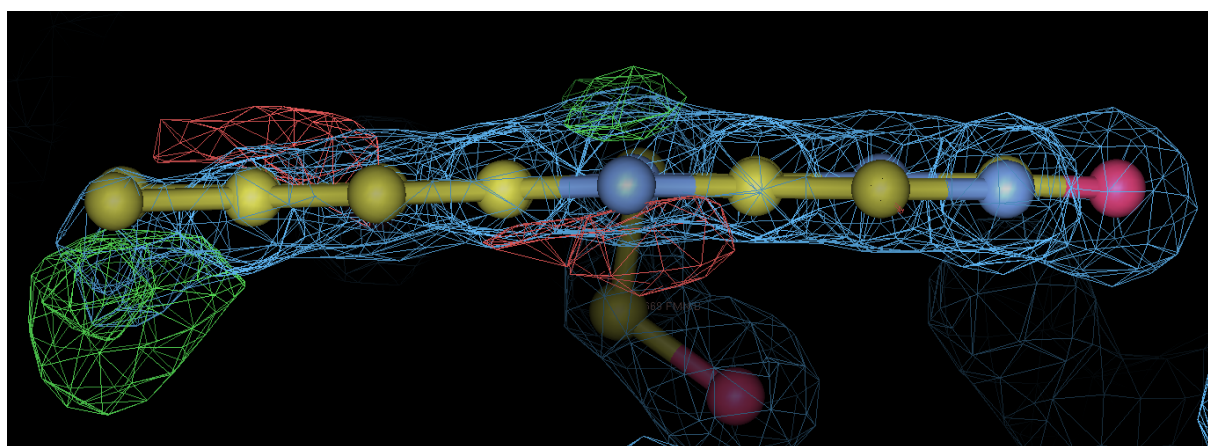

B

Both oxidized and reduced cofactors were refined against the data. A) When reduced restraints are applied the difference density is minimal and the FMNH<sub>2</sub> butterfly angle is 17°. B) Conversely, when oxidized restraints are used, significant difference density surrounds the planar isoalloxazine ring. 2Fo-Fc map is contoured at 1.0  $\sigma$  and Fo-Fc at 3.0  $\sigma$ .
